# Supplementary material for: One-pot photoenzymatic synthesis of maleic acid and its derivatives from bio-based furfural via catalytic cascades
Source: Royal Society of Chemistry journal article supplement (doi:10.1039/d3gc01882b), 2023-01-01
Supplement: d3gc01882b1.pdf [file d3gc01882b1.pdf]

# One-pot photoenzymatic synthesis of maleic acid and its derivatives from biobased furfural via catalytic cascades

Si-Mou Zou,<sup>a</sup> Jian-Peng Wang,<sup>a</sup> Min-Hua Zong,<sup>a</sup> Zhi-Lin Wang,<sup>b\*</sup> Zhao-Juan Zheng,<sup>c</sup> Ning Li<sup>a\*</sup>

<sup>a</sup> School of Food Science and Engineering, South China University of Technology, 381 Wushan Road, Guangzhou 510640, China

<sup>b</sup> Agro-biological Gene Research Center, Guangdong Academy of Agricultural Sciences, 20 Jinying Road, Guangzhou, 510640, China

<sup>c</sup> College of Chemical Engineering, Nanjing Forestry University, Nanjing, 210037, China

\* Corresponding authors.

Z. L. Wang, Email: [wangzhilin@gdaas.cn](mailto:wangzhilin@gdaas.cn)

Dr. N. Li, Email: [lining@scut.edu.cn](mailto:lining@scut.edu.cn)

## Materials

Furfural (99%), HFO (98%), D-MalA (99%), EY (80%), TiO<sub>2</sub> (P25, 20 nm), HRP (Rz > 3.0), and NaOH (96%) were purchased from Macklin Biochemical Technology Co., Ltd. (Shanghai, China). FCA (98%), NADP<sup>+</sup> (97%), HAuCl<sub>4</sub> (Au 23.5 ~ 23.8% in dilute HCl), NaBH<sub>4</sub> (98%), ABTS (98%), and Na<sub>2</sub>CO<sub>3</sub> (99.5%) were obtained from Aladdin Biochemical Technology Co., Ltd. (Shanghai, China). TEMPO (98%), xanthine oxidase (lyophilized powder, ≥7 units/mg solid) and catalase (2000-5000 U/mg protein) from bovine liver were from Sigma-Aldrich (USA). MA (>98%), FA (>99%), isopropyl β-D-1-thiogalactopyranoside (IPTG), DNA marker, protein marker, kanamycin, and ampicillin were from Sangon Biotech Co., Ltd. (Shanghai, China). *DpnI* endonuclease was purchased from TaKaRa Biotech Co., Ltd. (Dalian, China). Phanta Max Master Mix (Dye Plus) DNA polymerase was obtained from Nanjing Vazyme Biotech Co., Ltd. (Nanjing, China). CuSO<sub>4</sub> (≥99%), NaH<sub>2</sub>PO<sub>4</sub> (≥99.5%), and Na<sub>2</sub>HPO<sub>4</sub> (≥99.5%) were from Guangzhou Chemical Reagent Co., Ltd. (Guangzhou, China). The resin NKA-III was obtained from Qinshi Technology Co., Ltd. (Zhengzhou, China). All other chemicals used in this study were of analytical grade. The recombinant strains *E. coli* pRSFDuet-1\_GO M<sub>3-5</sub>, *E. coli* pET-28a(+)\_HbzIJ, *E. coli* pET-24a(+)\_MaiA, and *E. coli* pET-28a(+)\_PaALDH were recently constructed by us.<sup>1-3</sup> The gene of Ssl1 was optimized and synthesized by GenScript Biotechnology Co., Ltd. (Nanjing, China). The gene sequences of GO M<sub>3-5</sub> and Ssl1 were showed as below.

## Preparation of AuNPs@TiO<sub>2</sub>

AuNPs@TiO<sub>2</sub> was prepared according to a previous method.<sup>4</sup> Briefly, 0.5 g of TiO<sub>2</sub> powder was added to 100 mL water containing 0.063 g of HAuCl<sub>4</sub>, followed by addition of 4.25 mL of L-lysine (0.5 M) in 10 min with vigorous stirring. After stirring for 1 h, 10 mL aqueous solution of NaBH<sub>4</sub> (0.0265 g) was slowly added into the dispersion in 10 min. Then, the mixture was stirred for 24 h. Finally, the solid was collected, washed with distilled water and ethanol, and then dried at 60 °C for 12 h under vacuum.

## GO variants cloning

Whole plasmid PCR was used to introduce mutations to the GO M<sub>3-5</sub> gene by site-directed mutagenesis. The primers (Table S1) were designed on the basis of the gene sequence of the plasmid pRSFDuet-1\_GO M<sub>3-5</sub> and synthesized by Sangon Biotech (Shanghai, China). PCR was performed by Phanta Max Master Mix (Dye Plus) DNA polymerase in the presence of both forward and reverse primers, with pRSFDuet-1\_GO M<sub>3-5</sub> as the template. The PCR products were subjected to *DpnI* digestion to remove the template DNA and transformed into *E. coli* DH5 $\alpha$ . The resulting variants plasmids were verified by colony PCR and nucleotide sequencing.

Table S1. The primers used for the introduction of mutations to GO M<sub>3-5</sub>

| Variant          | Mutations                                           | Primer name   | Primer sequence(5'-3')              |
|------------------|-----------------------------------------------------|---------------|-------------------------------------|
| M <sub>4</sub>   | M <sub>3-5</sub><br>+Y329L/M330F                    | Y329L/M330F-F | GGTCTGctgtttAGCGATAATCATGCCTGGCTG   |
|                  |                                                     | Y329L/M330F-R | ATCGCTaaacagCAGACCCTGTTTATCTGCGGTC  |
| M <sub>5-1</sub> | M <sub>4</sub> +V477D/<br>A626S                     | V477D-F       | TCTATgatCCGGAACAGGATACCTTTTATAAAC   |
|                  |                                                     | V477D-R       | CTGTTCCGGatcATAGATTTCCGGGGTAAAAACCG |
|                  |                                                     | A626S-F       | GAATAGTagcGGCGTTCCGAGCGTTGCAAGCA    |
| M <sub>5-2</sub> | M <sub>4</sub> +N318D/<br>C383T/<br>Y436H/<br>V477D | A626S-R       | GAACGCCgctACTATTCATCACAAACAGCATCCAA |
|                  |                                                     | N318D-F       | AAAAGTGgatCCGATGCTGACCGCAGATAAAC    |
|                  |                                                     | N318D-R       | GCATCGGatcCACTTTTGCATTCGGCAGGCTG    |
|                  |                                                     | C383T-F       | TGCCATGaccGGTAATGCCGTGATGTATGATGC   |
|                  |                                                     | C383T-R       | CATTACCggtCATGGCATCCGGTGCAACACCA    |
|                  |                                                     | Y436H-F       | TGGTCTGcatTTTGCACGCACCTTTCATACCA    |
|                  |                                                     | Y436H-R       | GTGCAAAatgCAGACCATTGCTTGCAAAAACG    |
| V477D-F          | TCTATgatCCGGAACAGGATACCTTTTATAAAC                   |               |                                     |
| V477D-R          | CTGTTCCGGatcATAGATTTCCGGGGTAAAAACCG                 |               |                                     |

## Enzyme expression

*GO variant expression.* The recombinant plasmid pRSFDuet-1\_GO variant was transformed into *E. coli* BL21 (DE3) and pre-cultivated in 30 mL LB medium containing 50 mg/L kanamycin at 37 °C and 180 r/min overnight. Then, 100 mL LB medium containing 50 mg/L kanamycin was inoculated with 1 mL of an overnight culture. Cells were cultivated at 37 °C and 180 r/min. When OD<sub>600</sub> reached 0.6-0.8, IPTG was added to induce enzyme expression at the final concentration of 0.5 mM, followed by incubation at 26 °C and 160 r/min for 48 h. The cells were harvested by centrifugation (8500 r/min, 5 min, 4 °C) and washed twice with 0.85% NaCl solution for the subsequent use.

*SslI* expression. The recombinant plasmid pET-22b(+)\_SslI was transformed into *E. coli* BL21 (DE3) and pre-cultivated in 30 mL Terrific Broth (TB) medium containing 100 mg/L ampicillin at 37 °C and 180 r/min overnight. Then, 100 mL TB medium containing 100 mg/L ampicillin was inoculated with 1 mL of an overnight culture. Cells were cultivated at 37 °C and 180 r/min. When OD<sub>600</sub> reached 0.6-0.8, IPTG and CuSO<sub>4</sub> were added to induce enzyme expression at the final concentrations of 40 µM and 2 mM, respectively, followed by incubation at 25 °C and 160 r/min for 20 h. The cells were harvested by centrifugation (8500 r/min, 5 min, 4 °C) and washed twice with 0.85% NaCl solution for the subsequent use.

Expression of HbzIJ, MaiA, and PaALDH was conducted according to previous methods.<sup>1, 2</sup>

### **Enzyme purification**

The harvested cells were resuspended in binding buffer (pH 7.0, 0.1 M NaPi buffer, 0.5 M NaCl and 0.05 M imidazole) and disrupted by ultrasonication for 20 min (30% power, 3 s on and 5 s off at 4 °C). The cell lysate was centrifugated at 4 °C (12 000 r/min) for 20 min, and the supernatant was loaded onto a HisTrap™ FF crude column (GE, USA) equilibrated with binding buffer. Then, the samples were eluted with buffer (pH 7.0, 0.1 M NaPi buffer, 0.5 M NaCl and 0.1 M imidazole) at a flow rate of 1 mL/min to remove the impure proteins. Next, the elution of the target enzymes was conducted with an elution buffer (pH 7.0, 0.1 M NaPi buffer, 0.5 M NaCl and 0.4 M imidazole) with a flow rate of 3 mL/min. The fractions containing target enzymes were desalted by HiTrap™ desalting column (5 mL, GE, USA) with desalting buffer (pH 7.0, 0.1 M NaPi buffer). The purified protein fractions were subjected to SDS-PAGE analysis to determine its purity (Figures S5 and S6). Additionally, the protein concentrations were measured by the Bradford protocol.

### **Preparation of GO M<sub>3-5</sub> CFE**

After expression, 1 g of GO M<sub>3-5</sub> wet cells were resuspended in 10 mL NaPi buffer (0.1 M, pH 7) and then disrupted by ultrasonication for 20 min. The cell lysate was centrifugated at 4 °C (12 000 r/min) for 20 min, and the supernatant was frozen at -80 °C and vacuum lyophilized to produce cell free extract (CFE). Approximately 0.28 g CFE was obtained from 10 mL of crude enzyme supernatant.

### **HPLC analysis**

The reaction mixtures were analyzed on a Zorbax Eclipse Plus C18 column (4.6 mm × 250 mm, 5 µm, Agilent, USA) by using a reversed phase HPLC equipped with a Waters 996 photodiode array detector (Waters, USA). The quantitative analysis for furfural (maximum absorption wavelength: 278 nm, retention time: 21.1 min), FCA (246 nm, 10.3 min), HFO (210 nm, 6.4 min), and MA (210 nm, 5.9 min) were performed with the mixture of acetonitrile/0.4% (NH<sub>4</sub>)<sub>2</sub>SO<sub>4</sub> solution with pH 3.5 (5:95, v/v) as the mobile phase. The mixture of acetonitrile/0.4% (NH<sub>4</sub>)<sub>2</sub>SO<sub>4</sub> solution with pH 3.5 (10:90, v/v) was used as the mobile phase for quantifying FA (210 nm, 4.5 min). The column temperature and the flow rate of the mobile phase were 35 °C and 0.6 mL/min, respectively.

The quantitative analysis for D-MalA were analyzed on a Titank C18 column (4.6mm×250 mm, 5 µm, Phenomenex, USA) with Waters 2489 UV/Visible detector (Waters, USA). The retention times and detecting wavelength for D-MalA were 7.9 min and 220 nm with 20 mM phosphoric acid solution as mobile phase, respectively. The column temperature and the flow rate of the mobile phase were 35 °C and 0.6 mL/min, respectively.

Some representative HPLC chromatograms are attached as follows.

### **Enzyme assay**

The GO variant activity was spectrophotometrically determined using a UV2550 UV-visible spectrophotometer (Shimadzu, Japan) at 25 °C by measuring the ABTS oxidation at 420 nm ( $\epsilon$  of oxidized ABTS:  $36000 \text{ L M}^{-1} \text{ cm}^{-1}$ ) in 2 mL NaPi buffer (0.1 M, pH 7) containing 50 mM HFO, 1 mM ABTS, 5  $\mu\text{g/mL}$  HRP, and appropriate amount of purified GO variant. One unit (U) is defined as the amount of enzyme which oxidizes 1  $\mu\text{mol}$  ABTS per minute under the standard assay conditions. The specific activities of GO M<sub>3-5</sub>, M<sub>4</sub>, and M<sub>5-1</sub> were around 0.15, 0.57, and 0.92 U/mg, respectively.

### **Oxidation of furfural by XO and AuNPs@TiO<sub>2</sub>**

*XO*: 2 mL NaPi buffer (0.1 M, pH 7) containing 20 mM furfural, 0.11 mg/mL XO (1 U) and 1 mg/mL CAT was incubated at 250 r/min and 30 °C. Aliquots were withdrawn at specified time intervals from the reaction mixture. The samples were treated at 100 °C for 10 min to denature the enzymes, and then diluted with the corresponding mobile phase prior to HPLC analysis. All the experiments were conducted in duplicate, and all the data were the averages of experimental results. The conversion and yield were determined by reversed-phase HPLC, based on the corresponding calibration curves.

*AuNPs@TiO<sub>2</sub>*: 2 mL NaPi buffer (0.1 M, pH 7) containing 20 mM furfural, 25 mg AuNPs@TiO<sub>2</sub> and 0.1 M Na<sub>2</sub>CO<sub>3</sub> was irradiated under 30 W green LEDs (530-540 nm) at 250 r/min and 25 °C. Aliquots were withdrawn at specified time intervals from the reaction mixture. The samples were diluted with the corresponding mobile phase prior to HPLC analysis. All the experiments were conducted in duplicate, and all the data were the averages of experimental results. The conversion and yield were determined by reversed-phase HPLC, based on the corresponding calibration curves.

### **GO-catalyzed oxidation of HFO**

Typically, 2 mL NaPi buffer (0.1 M, pH 7) containing 10-20 mM HFO, 0.1-1 mg/mL purified GO variant, 0.02 mg/mL HRP, 0.35 mg/mL CAT and 0.01-2 mM CuSO<sub>4</sub> was incubated at 250 r/min and 30 °C. Aliquots were withdrawn at specified time intervals from the reaction mixture. The samples were treated at 100 °C for 10 min to denature the enzymes, and then diluted with the corresponding mobile phase prior to HPLC analysis. All the experiments were conducted in duplicate, and all the data were the averages of experimental results. The conversion and yield were determined by reversed-phase HPLC, based on the corresponding calibration curves.

### **Photoenzymatic oxidation of furfural by *Pa*ALDH and EY@NKA**

2 mL NaPi buffer (0.1 M, pH 7) containing 20 mM furfural, 1 mg/mL purified *Pa*ALDH, 0.5 mM NADP<sup>+</sup> and 5 mol% EY@NKA was irradiated under 30 W green LEDs (530-540 nm) at 250 r/min and 25 °C. Aliquots were withdrawn at specified time intervals from the reaction mixture. The samples were treated at 100 °C for 10 min to denature the enzyme, and then diluted with the corresponding mobile phase prior to HPLC analysis. All the experiments were conducted in duplicate, and all the data were the averages of experimental results. The conversion and yield were determined by reversed-phase HPLC, based on the corresponding calibration curves.

### **Concurrent photoenzymatic oxidation FCA to MA by EY@NKA and GO M<sub>4</sub>/M<sub>5-1</sub>**

Typically, 2 mL NaPi buffer (0.1 M, pH 7) containing 20 mM FCA, 5 mol% EY@NKA, 0.02 mg/mL HRP, 0.35 mg/mL CAT, 0.1 mM CuSO<sub>4</sub>, and 0.7 mg/mL purified GO variant was incubated at 25 °C and 250 r/min under light irradiation by green LEDs (30 W, 530-540 nm). Aliquots were withdrawn at specified time intervals from the reaction mixture. The samples were treated at 100 °C for 10 min to denature the enzymes, and then diluted with the corresponding mobile phase prior to HPLC analysis. All the experiments were conducted in duplicate, and all the data were the averages of experimental results. The conversion and yield were determined by reversed-phase HPLC, based on the corresponding calibration curves.

### **One-pot three-step synthesis of FA**

1 mL NaPi buffer (0.1 M, pH 7) containing 40 mM furfural, 1 mg/mL purified *Pa*ALDH, 0.5 mM NADP<sup>+</sup> and 5 mol% EY@NKA was incubated at 25 °C and 250 r/min under light irradiation by green LEDs (30 W, 530-540 nm). After 6 h, 0.7 mg/mL purified GO M<sub>5-1</sub>, 0.02 mg/mL HRP, 0.35 mg/mL CAT and 0.1 mM CuSO<sub>4</sub> were supplemented, followed by the reaction under green light irradiation at 25 °C and 250 r/min. After 36 h, pH of the reaction mixtures was to 8.5 by NaOH. Then 0.1 mg/mL purified *MaiA* were added and incubated at 450 r/min and 25 °C. Aliquots were withdrawn at specified time intervals from the reaction mixture. The samples were treated at 100 °C for 10 min to denature the enzymes, and then diluted with the corresponding mobile phase prior to HPLC analysis. All the experiments were conducted in duplicate, and all the data were the averages of experimental results. The conversion and yield were determined by reversed-phase HPLC, based on the corresponding calibration curves.

### **One-pot three-step synthesis of D-MaIA**

1 mL NaPi buffer (0.1 M, pH 7) containing 40 mM furfural, 1 mg/mL purified *Pa*ALDH, 0.5 mM NADP<sup>+</sup> and 5 mol% EY@NKA was incubated at 25 °C and 250 r/min under light irradiation by green LEDs (30 W, 530-540 nm). After 6 h, 0.7 mg/mL purified GO M<sub>5-1</sub>, 0.02 mg/mL HRP, 0.35 mg/mL CAT and 0.1 mM CuSO<sub>4</sub> were supplemented, followed by the reaction under green light irradiation at 25 °C and 250 r/min. After 36 h, pH of the reaction mixtures was to 8.5 by NaOH. Then 50 mg/mL (wet cell weight) *E. coli* HbzIJ cells were added and incubated at 450 r/min and 25 °C. Aliquots were withdrawn at specified time intervals from the reaction mixture. The samples were treated at 100 °C for 10 min to denature the enzymes, and then diluted with the corresponding mobile phase prior to HPLC analysis. All the experiments were conducted in duplicate, and all the data were the averages of experimental results. The conversion and yield were determined by reversed-phase HPLC, based on the corresponding calibration curves.

Table S2. Screening of biocatalysts for HFO oxidation<sup>a</sup>

| Entry | Enzyme                                                                  | Abbreviation        | Specific activity (U/mg) |
|-------|-------------------------------------------------------------------------|---------------------|--------------------------|
| 1     | Galactose oxidase M <sub>3-5</sub> from <i>Fusarium graminecola</i>     | GO M <sub>3-5</sub> | 0.15 <sup>b</sup>        |
| 2     | Alcohol dehydrogenase from <i>Pichia finlandica</i> <sup>5</sup>        | <i>Pf</i> ADH       | n.a. <sup>c</sup>        |
| 3     | Alcohol dehydrogenase from <i>Rhodococcus erythropolis</i> <sup>6</sup> | <i>Re</i> ADH       | n.a.                     |
| 4     | Alcohol dehydrogenase from <i>Synechocystis</i> sp. <sup>7</sup>        | <i>Syn</i> ADH      | n.a.                     |
| 5     | Methanol dehydrogenase from <i>Cupriavidus necator</i> N-1 <sup>8</sup> | <i>Cn</i> MDH       | n.a.                     |
| 6     | Horse liver alcohol dehydrogenase <sup>7</sup>                          | HLADH               | n.a.                     |
| 7     | Carbonyl reductase from <i>Streptomyces coelicolor</i> <sup>9</sup>     | <i>Sc</i> CR        | n.a.                     |

<sup>a</sup> Assay conditions: 10 mM HFO, 0.2 mM NAD<sup>+</sup>, 0.1-0.5 mg purified enzyme, 2 mL NaPi buffer (100 mM, pH 7), 25 °C.

<sup>b</sup> 50 mM HFO, appropriate amount of GO variant, 1 mM ABTS, 5 µg/mL HRP, 2 mL NaPi buffer (0.1 M, pH 7), 25 °C.

<sup>c</sup> no activity.

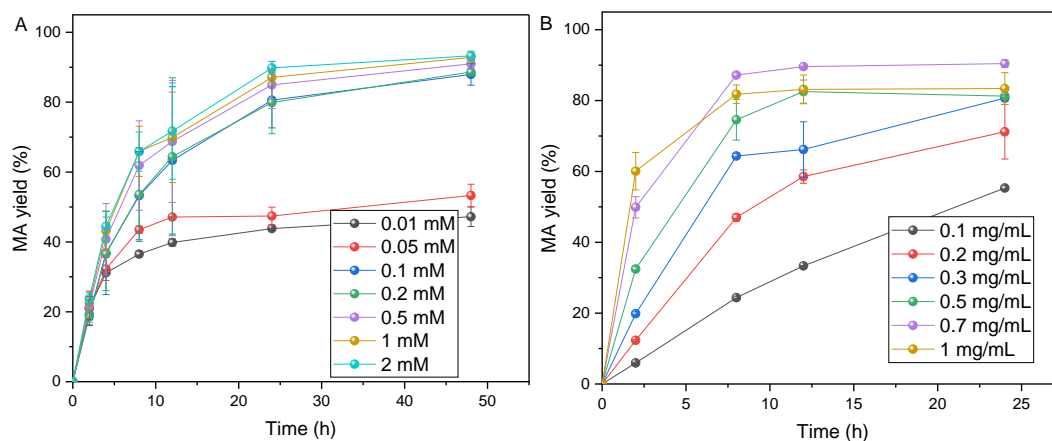

Figure S1. Effect of Cu<sup>2+</sup> (A) and GO M<sub>3-5</sub> (B) concentrations on enzymatic oxidation of HFO to MA. General reaction conditions unless otherwise stated: 10 mM HFO, 0.7 mg/mL purified GO M<sub>3-5</sub>, 0.02 mg/mL HRP, 0.35 mg/mL CAT, 0.1 mM CuSO<sub>4</sub>, 2 mL NaPi buffer (0.1 M, pH 7), 30 °C, 250 r/min; (A) 0.5 mg/mL purified GO M<sub>3-5</sub>, 0.01-2 mM CuSO<sub>4</sub>; (B) 0.1-1 mg/mL purified GO M<sub>3-5</sub>.

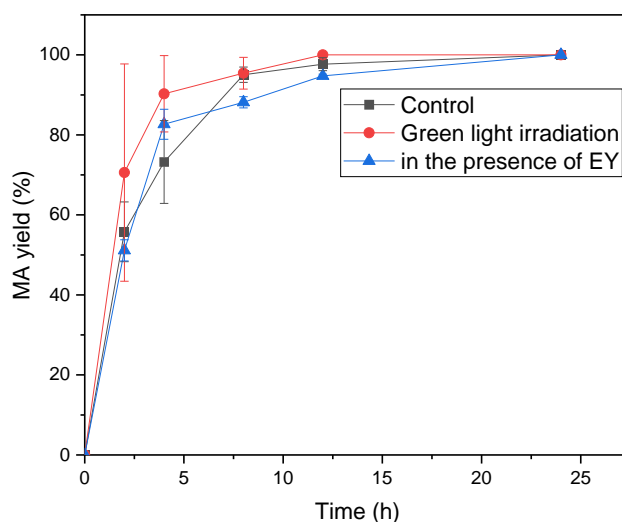

Figure S2. Effect of green light irradiation and the presence of EY on GO M<sub>3-5</sub>-catalyzed oxidation of HFO. Reaction conditions: 10 mM HFO, 2 mg/mL GO M<sub>3-5</sub> CFE, 0.02 mg/mL HRP, 0.35 mg/mL CAT, 0.1 mM CuSO<sub>4</sub>, 2 mL NaPi buffer (0.1 M, pH 7), 25 °C, 250 r/min; green light or 2 mol% EY.

Table S3. Specific activities of GO variants toward HFO<sup>a</sup>

| Entry | Enzyme              | Specific activity (U/mg) |
|-------|---------------------|--------------------------|
| 1     | GO M <sub>4</sub>   | 0.57                     |
| 2     | GO M <sub>5-1</sub> | 0.92                     |
| 3     | GO M <sub>5-2</sub> | n.a. <sup>b</sup>        |

<sup>a</sup>Assay conditions: 50 mM HFO, appropriate amount of purified GO variant, 1 mM ABTS, 5 µg/mL HRP, 2 mL NaPi buffer (0.1 M, pH 7), 25 °C.

<sup>b</sup> no activity.

Table S4. GO-catalyzed oxidation of HFO

| Entry | Catalyst            | Time (h) | MA yield (%) |
|-------|---------------------|----------|--------------|
| 1     | GO M <sub>4</sub>   | 12       | 96           |
| 2     | GO M <sub>5-1</sub> | 8        | >99          |

Reaction conditions: 20 mM HFO, 0.7 mg/mL purified GO variant, 0.02 mg/mL HRP, 0.35 mg/mL CAT, 0.1 mM CuSO<sub>4</sub>, 2 mL NaPi buffer (0.1 M, pH 7), 25 °C, 250 r/min.

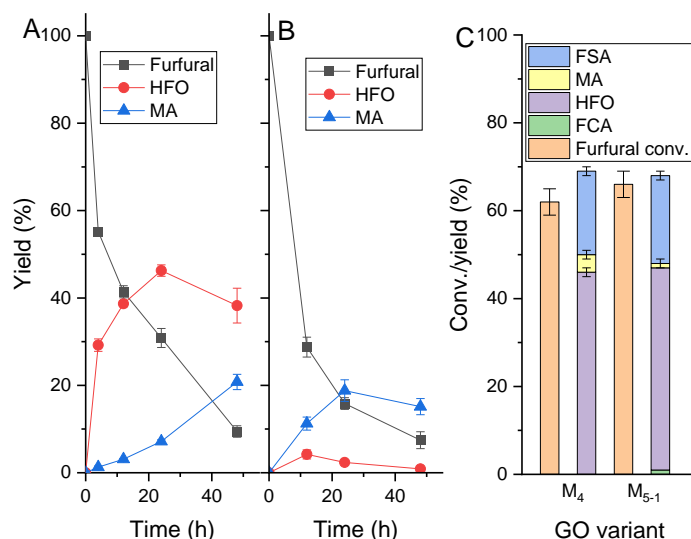

Figure S3. One-pot concurrent photoenzymatic conversion of furfural into MA by XO coupled with EY@NKA and GO M<sub>3-5</sub> (A), by AuNPs@TiO<sub>2</sub> coupled with EY@NKA and GO M<sub>3-5</sub> (B), and by *Pa*ALDH, EY@NKA and GO variant (C). Reaction conditions (A and B): 20 mM furfural, 0.33 mg/mL XO (3 U) (A)/25 mg AuNPs@TiO<sub>2</sub> and 0.1 M Na<sub>2</sub>CO<sub>3</sub> (B), 5 mg/mL GO M<sub>3-5</sub> CFE, 0.02 mg/mL HRP, 0.35 mg/mL CAT, 0.1 mM CuSO<sub>4</sub>, 5 mol% EY@NKA, green light, 2 mL NaPi buffer (0.1 M, pH 7), 25 °C, 250 r/min; reaction conditions (C): 20 mM furfural, 1 mg/mL purified *Pa*ALDH, 0.5 mM NADP<sup>+</sup>, 0.7 mg/mL purified GO variant, 0.02 mg/mL HRP, 0.35 mg/mL CAT, 0.1 mM CuSO<sub>4</sub>, 5 mol% EY@NKA, green light, 2 mL NaPi buffer (0.1 M, pH 7), 25 °C, 250 r/min, 12 h.

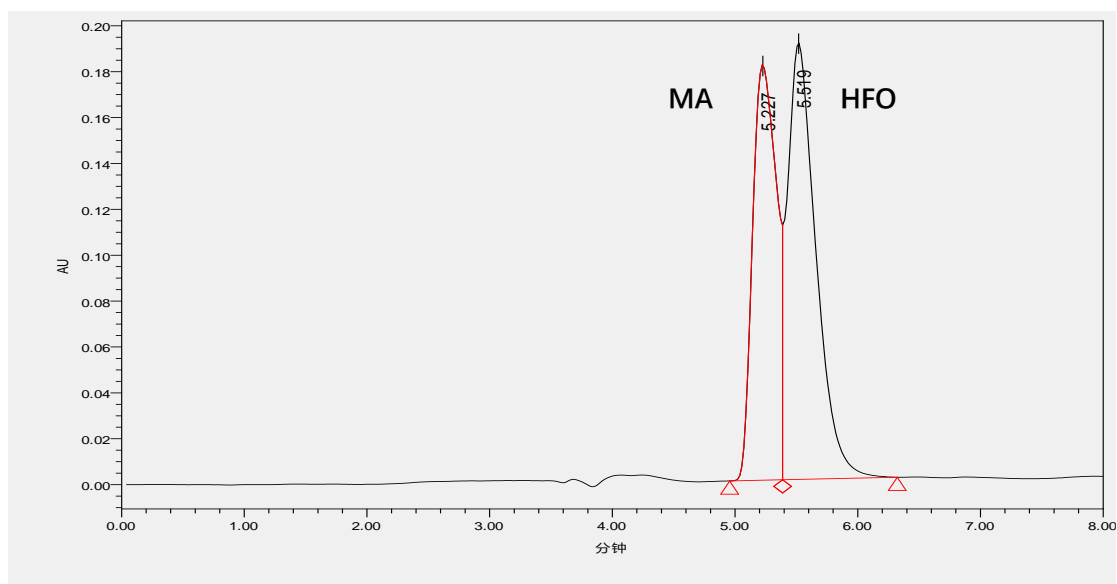

Figure S4. HPLC chromatogram with unsatisfactory chromatographic resolution of MA and HFO



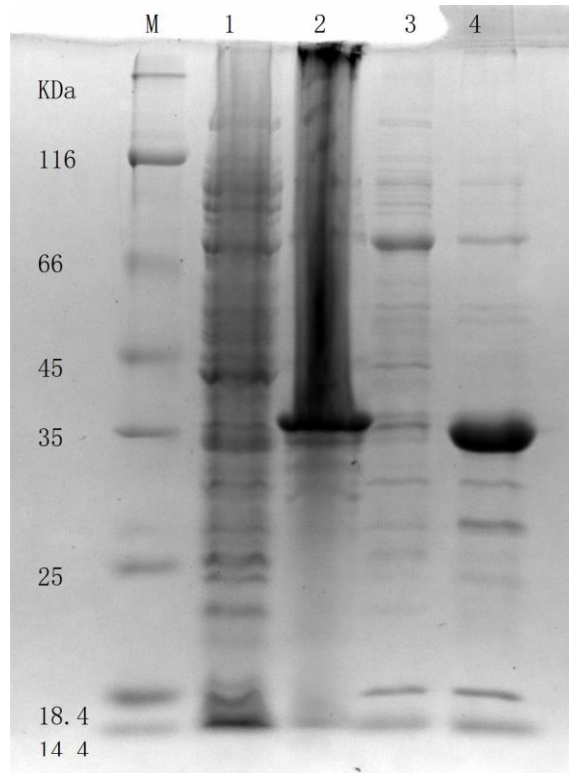

Figure S5. SDS-PAGE analysis of Ssl1. Lane M: protein marker; lane 1: the supernatant upon ultrasonication of the cells; lane 2: the precipitant upon ultrasonication of the cells; lane 4: purified enzyme

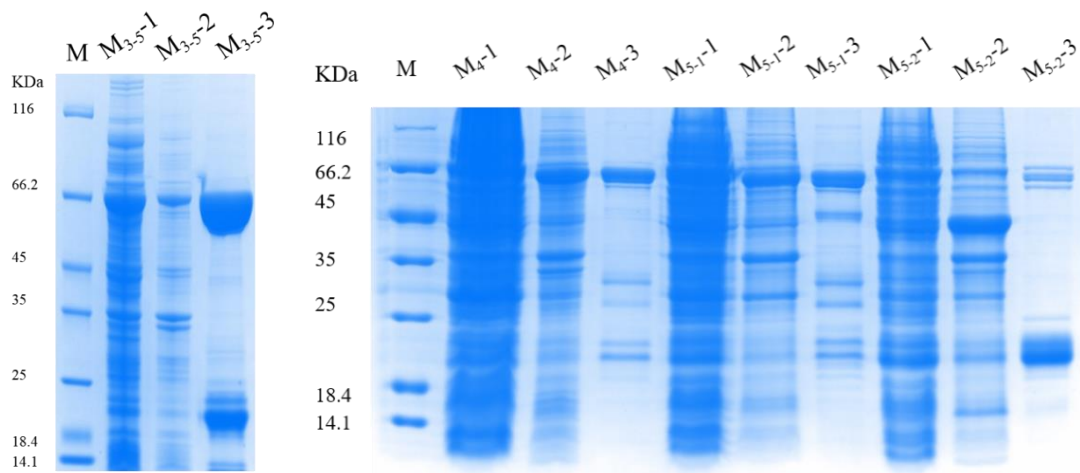

Figure S6. SDS-PAGE analysis of GO variants. Lane M: protein marker; lane 1: the supernatant upon ultrasonication of the cells; lane 2: the precipitant upon ultrasonication of the cells; lane 3: purified enzyme

## HPLC chromatograms

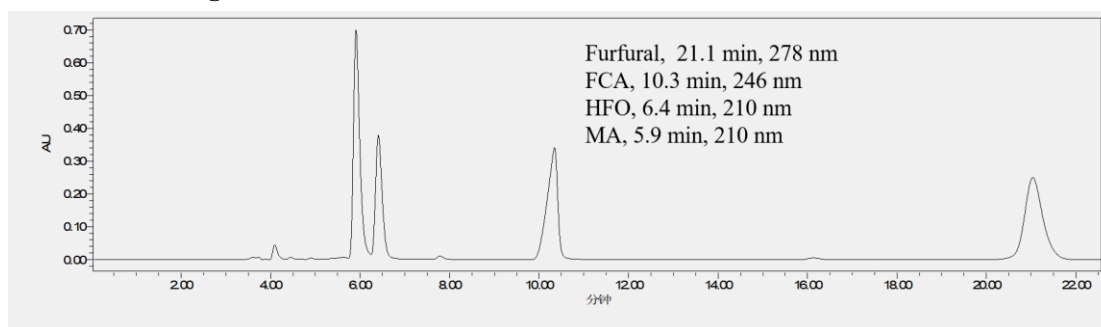

Figure S7. Representative HPLC chromatogram for quantitative analysis of MA

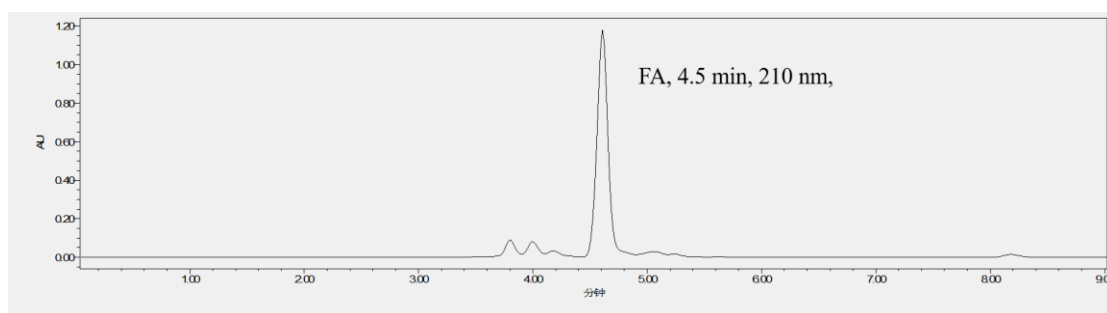

Figure S8. Representative HPLC chromatogram for quantitative analysis of FA

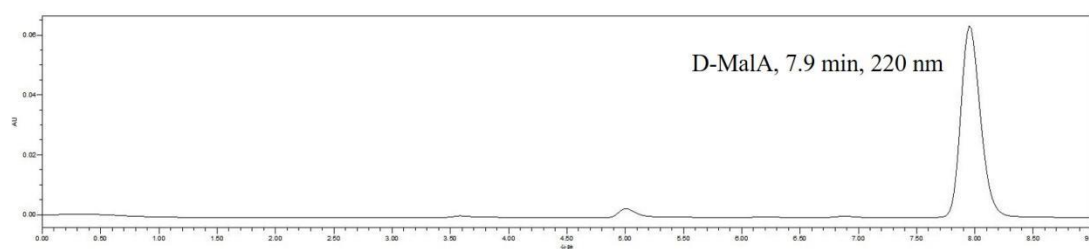

Figure S9. Representative HPLC chromatogram for quantitative analysis of D-MalA

## GO M<sub>3.5</sub> gene sequence

```
GCAAGTGCCCCGATTGGTAGTGCCATTCCGCGTAATAATTGGGCCGTGACCTGTGATAG
CGCACAGAGTGGCAATGAATGCAATAAGGCAATTGATGGTAATAAGGATACCTTTTGGC
ATACCTTTTATGGCGCCAATGGTGACCCGAAACCGCCGCATACCTATAACCATTGATATGA
AAACCACCCAGAATGTTAATGGTCTGAGTGTGCTGCCGCGTCAGGATGGCAATCAGAA
TGGTTGGATTGGCCGTCATGAAGTTTATCTGAGTAGCGATGGCACCAATTGGGGTAGTC
CGGTGGCCAGTGGCAGTTGGTTTGCCGATAGCACCACCAATATAGCAATTTTGAAAC
CCGTCCGGCACGTTATGTTTCGCCTGGTGGCCATTACCGAAGCAAATGGCCAGCCGTGG
ACCAGTATTGCCGAAATTAATGTTTTTCAGGCCAGTAGTTATACCGCCCCGAGCCGGG
TCTGGGTCGTTGGGGTCTACCATTGATCTGCCGATTGTGCCGGCCGCCGAGCAATTG
AACCGACCAGTGGCCGTGTTCTGATGTGGAGTAGTTATCGCAATGATGCATTTGAAGGT
AGTCCGGGGCGGTATTACCCTGACCAGCAGTTGGGATCCGAGTACCGGCATTGTGAGCG
ATCGTACCGTTACCGTTACCAAACATGATATGTTTTGTCCGGGCATTAGCATGGATGGCA
ATGGCCAGATTGTGGTGACCGGTGGCAATGATGCAAAAAAGACCAGTCTGTATGATAG
TAGCAGTGATAGTTGGATTCCGGGCCCCGGATATGCAGGTGGCCCCGTGGTTATCAGAGCA
CGCCACCATGAGTGATGGTCGCGTTTTTACCATTGGCGGTAGTTTTAGCGGTGGTGTG
```

TTTGAAAAGAATGGCGAAGTTTATAGTCCGAGTAGTAAAACCTGGACCAGCCTGCCGA  
ATGCAAAAGTGAATCCGATGCTGACCGCAGATAAACAGGGTCTGTATATGAGCGATAAT  
CATGCCTGGCTGTTTGGCTGGAAAAAAGGCAGCGTGTTTCAGGCAGGCCCGAGCACC  
GCCATGAATTGGTATTATACCAGCGGCAGTGGCGATGTGAAAAGCGCAGGTAAACGTC  
AGAGTAATCGTGGTGTTCACCGGATGCCATGTGTGGTAATGCCGTGATGTATGATGCC  
GTGAAAGGCAAAATTCTGACCTTTGGCGGCAGTCCGGATTATACCGATAGCGATGCCA  
CCACCAATGCACATATTATTACCCTGGGCGAACCGGGTACCAGTCCGAATACCGTTTTT  
GCAAGCAATGGTCTGTATTTTGCACGCACCTTTCATACCAGCGTTGTTCTGCCGGATGG  
TAGCACCTTTATTACCGGTGGCCAGCGTCGCGGCATTCCGTTTGAAGATAGTACCCCGG  
TTTTTACCCCGGAAATCTATGTGCCGGAACAGGATACCTTTTATAAACAGAATCCGAAT  
AGTATCGTGCCTATCATAGCATTAGCCTGCTGCTGCCGGATGGCCGTGTGTTAAT  
GGCGGTGGTGGCCTGTGTGGTACTGTACCACCAATCATTGATGCACAGATTTTTAC  
CCCGAATTATCTGTATGATAGCAATGGTAATCTGGCCACCCGTCCGAAAATTACCCGTAC  
CAGCACCAGAGCGTTAAAGTGGGCGGCCGTATTACCATTAGTACCGATAGCAGCATT  
GTAAAGCAAGCCTGATTTCGTTATGGTACCGCCACCCATACCGTGAATACCGATCAGCGT  
CGCATTCCGCTGACCCTGACCAATAATGGCGGTAATAGCTATAGCTTTCAGGTTCCGAG  
CGATAGCGGTGTTGCACTGCCGGTATTGGATGCTGTTTGTGATGAATAGTGCAGGCG  
TTCCGAGCGTTGCAAGCACCATTTCGTGTGACCCAGTAA

#### **SslI gene sequence**

ATGCATCACCACCACCACCATGCTCCCGGAGGCGAAGTTCGTCGCATCAAACCTGTATG  
CGAACGTCTGGCGGACGGCCAGATGGGTTACGGCTTGGAGAAAGGTCGTGCCACCA  
TCCCGGGACCGCTGATTGAGCTGAATGAAGGTGATACCTCCACATTGAGTTCGAGAA  
CACCATGGACGTGCGCGGAGCCTGCACGTTTCATGGCCTGGACTACGAGGTGAGCAG  
CGACGGCACGACCTTGAACAAATCGGATGTGGAACCGGGTGGCACGCGTACCTATAACC  
TGGCGCACTCACGCTCCGGGGCGTCGCTCCGACGGCACGTGGCGTGCGGGTAGCGCC  
GGCTACTGGCATTATCACGATCATGTGGTGGGAACCGAACACGGCACCGGTGGTATTC  
GCAAGGGTTTTGTACGGTCCGGTTATCGTGCGTAGAAAGGGCGACGTTCTGCCGGATGC  
AACCCACACCATTGTCTTTAATGATATGCTGATCAACAACCGTCCGGCGCATAGCGGTC  
CAAATTTTCGAGGCAACTGTAGGCGACCGTGTTGAGTTCGTGATGATTACGCACGGTGA  
ATATTACCACACCTTCCACATGCATGGTCATCGTTGGGCAGACAACCGCACCGGCATGC  
TGACCGGTCCAGATGATCCGAGCCAAGTGGTTGATAACAAGATCGTTGGTCCGGCGGA  
CTCTTTTGGTTTTTCAGGTGATCGCCGGCGAGGGCGTCGGTGCGGGTGCTTGGATGATC  
ACTGCCATGTCCAATCACATTCCGACATGGGTATGGTTGGCTTATTTCTGGTTAAAAAG  
ACCGATGGGACGATCCCGGGCTACGAGCCGCATGAACACTCTGGTCAGCGTGCGGAG  
CACCACCACTAA

HbzIJ and MaiA gene sequences can be obtained from ref. 2.

#### **References**

1. J.-R. Dai, J.-T. Sha, M.-H. Zong and N. Li, *ChemCatChem*, 2023, **15**, e202300330.
2. G.-H. Lu, M.-H. Zong and N. Li, *ACS Catal.*, 2023, **13**, 1371-1380.
3. H. Tan, F. Zhou, D. Liao, J. Ouyang and Z. Zheng, *Biochem. Eng. J.*, 2020, **161**, 107657.
4. B. Zhou, J. Song, Z. Zhang, Z. Jiang, P. Zhang and B. Han, *Green Chem.*, 2017, **19**, 1075-1081.

5. H. Yamamoto and M. Kudoh, *Appl. Microbiol. Biotechnol.*, 2013, **97**, 8087-8096.
6. K. Abokitse and W. Hummel, *Appl. Microbiol. Biotechnol.*, 2003, **62**, 380-386.
7. H.-Y. Jia, M.-H. Zong, G.-W. Zheng and N. Li, *ChemSusChem*, 2019, **12**, 4764-4768.
8. T.-Y. Wu, C.-T. Chen, J. T.-J. Liu, I. W. Bogorad, R. Damoiseaux and J. C. Liao, *Appl. Microbiol. Biotechnol.*, 2016, **100**, 4969-4983.
9. Y.-C. Hao, M.-H. Zong, Z.-L. Wang and N. Li, *Bioresour. Bioprocess.*, 2021, **8**, 80.
